# Supplementary material for: Exploring substrate promiscuity of chlorophenol hydroxylase against biphenyl derivatives
Source: Royal Society of Chemistry journal article supplement (doi:10.1039/c5ra16935f), 2015-01-01
Supplement: c5ra16935f1.pdf [file c5ra16935f1.pdf]

### Supplementary

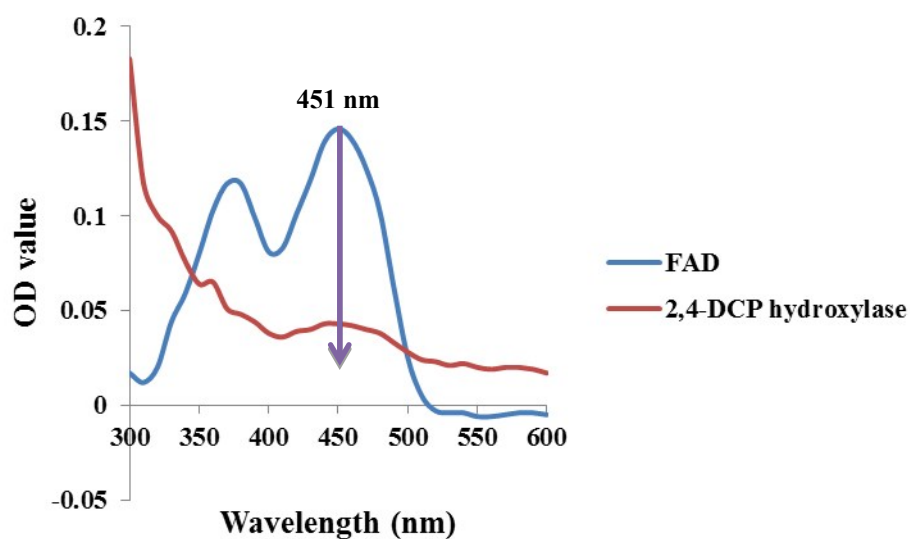

**Fig. S1.** UV-Vis spectrum of FAD and 2,4-dichlorophenol hydroxylase. Spectrum was measured in the range of 200 to 700 nm at 25°C, and the results were shown in the range of 300 to 600 nm. The concentration of FAD and enzyme solution used for spectrum experiment was 0.01 mM and 3.3  $\mu$ M, respectively.
